# Supplementary material for: Potential of Lycii Radicis Cortex as an Ameliorative Agent for Skeletal Muscle Atrophy
Source: MDPI journal article supplement (doi:10.3390/ph17040462), 2024-04-04
Supplement: s1 [file s1]

**Table S1.** Primer information.

| Sample               | Species | Gene      | Sequence (F)                 | Sequence (R)                  |
|----------------------|---------|-----------|------------------------------|-------------------------------|
| C2C12 myotubes       | Mouse   | Myogenin  | 5'-AGTACATTGAGCGCCTACAG-3'   | 5'-GACGTAAGGGAGTGCAGATT-3'    |
|                      | Mouse   | Myostatin | 5'-CTGTAACCTTCCCAGGACCA-3'   | 5'-GCAGTCAAGCCCAAAGTCTC-3'    |
|                      | Mouse   | MuRF1     | 5'-TGCCTACTTGCTCCTTGTGC-3'   | 5'-CACCAGCATGGAGATGCAGT-3'    |
|                      | Mouse   | Atrogin-1 | 5'-CTGCCTGTGTGCTTACAACT-3'   | 5'-TGCTCTCTTCTTGGGTAACA-3'    |
|                      | Mouse   | GAPDH     | 5'-ACTCCACTCACGGCAAATTC-3'   | 5'-TCTCCATGGTGGTGAAGACA-3'    |
| Gastrocnemius muscle | Mouse   | MuRF1     | 5'-ACCTGCTGGTGGAAAACATC-3'   | 5'-AGGAGCAAGTAGGCACCTCA-3'    |
|                      | Mouse   | Atrogin-1 | 5'-ATGCACACTGGTGCAGAGAG-3'   | 5'-TGTAAGCACACAGGCAGGTC-3'    |
|                      | Mouse   | IGF-1     | 5'-GGACCAGAGACCCTTTGCGGGG-3' | 5'-GCTGCTTTGTAGGCTTCAGTGG-3'  |
|                      | Mouse   | GAPDH     | 5'-GTCATCATCTCCGCCCTTCTGC-3' | 5'-GATGCCTGCTCACCACCTTCTTG-3' |
